# Supplementary material
Source: publisher figshare collection journal article supplement (https://acs.figshare.com/ndownloader/files/4659043)
Supplement: Supplementary file 1 [file 4659043]

## **FATE OF PRIONS IN SOIL: INTERACTIONS OF RecPrP WITH ORGANIC MATTER OF SOIL AGGREGATES AS REVEALED BY LTA-PAS**

Amaranta Pucci<sup>1,2</sup>, Luigi Paolo D'Acqui<sup>2</sup>, Luca Calamai<sup>1</sup>

<sup>1</sup> Dipartimento di Scienza del Suolo e Nutrizione della Pianta, Università degli Studi di Firenze, Piazzale Cascine 28 50144 Firenze, Italy

<sup>2</sup> Istituto per lo Studio degli Ecosistemi, CNR Via Madonna del Piano 10, 50019 Sesto Fiorentino (FI), Italy.

Figure S1, page S2: Kinetics of organic C and N removal in natural aggregates from CM soil;

Figure S2, page S2: Kinetics of organic C and N removal in natural aggregates from SS;

Figure S3, page S3: Adsorption kinetics of RecPrP on CM and LTACM soils at plateau;

Figure S4, page S3: PAS-FTIR-spectra of SS, SS after LTA treatment and PAS-FTIR difference spectrum;

Figure S5 page S4: PAS-FTIR-spectra of SS after RecPrP adsorption, SS and PAS-IR difference spectrum;

Table S1, page S4: Soil characteristics;

Table S2, page S5: Organic C and N removal in native SS and CM aggregates;

Table S3, page S5: Soil Mineralogy.

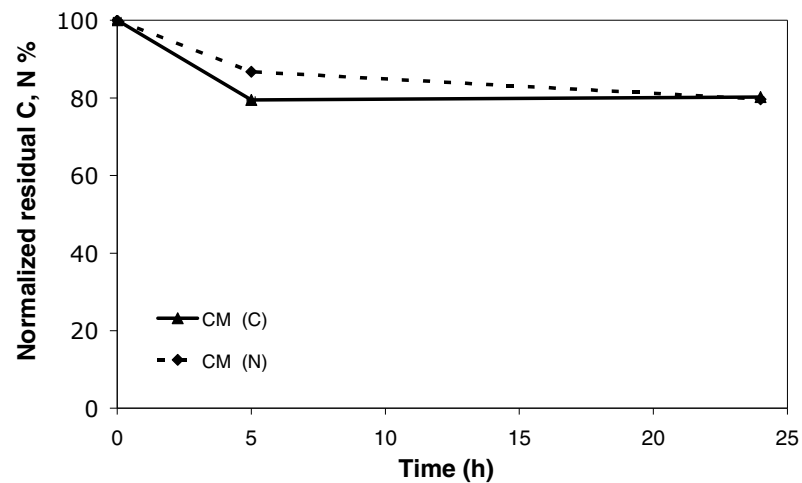

Figure S1. Kinetics of organic C and N removal in natural aggregates from CM soil.

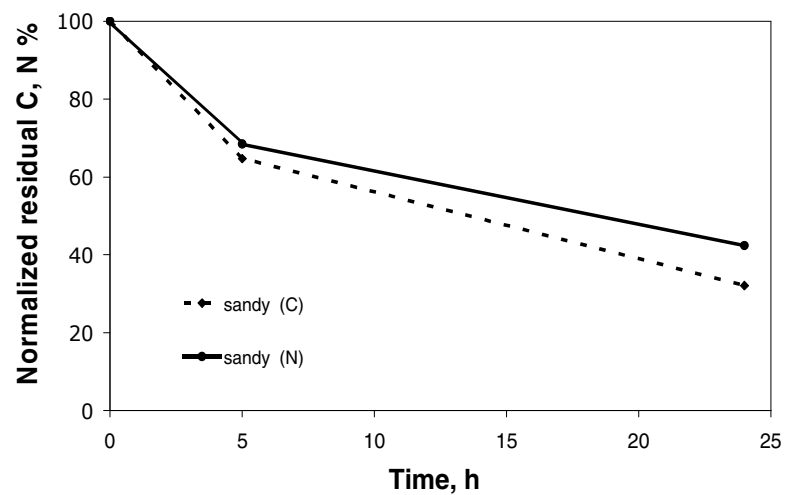

Figure S2. Kinetics of organic C and N removal in natural aggregates from SS.

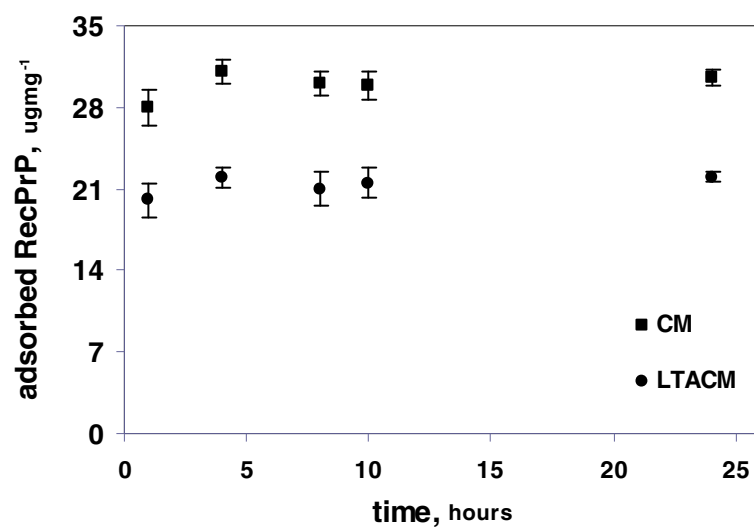

Figure S3. Adsorption kinetics of RecPrP on CM and LTACM soils at plateau.

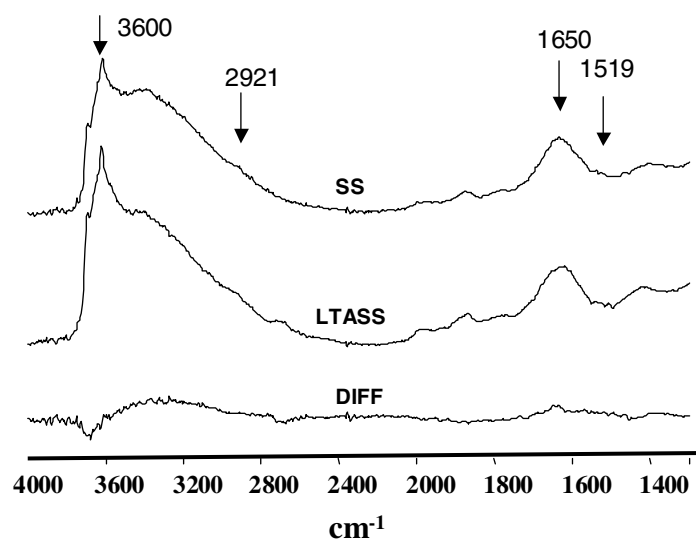

Figure S4. PAS-FTIR-spectra of SS, SS after LTA treatment and PAS-FTIR difference spectrum.

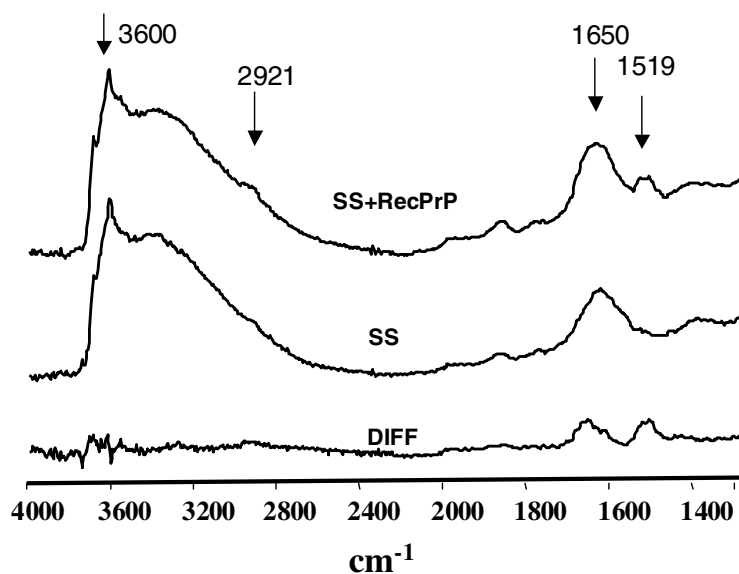

Figure S5. PAS-FTIR-spectra of SS after RecPrP adsorption, SS and PAS-IR difference spectrum.

| <b>TableS1</b>                                             |                       |                                          |
|------------------------------------------------------------|-----------------------|------------------------------------------|
| <b>Soil characteristics</b>                                | <b>CM<sup>a</sup></b> | <b>SS<sup>b</sup></b><br>(Scottish sand) |
| <b>pH</b>                                                  | 5.2                   | 6.98                                     |
| <b>Particles Size</b>                                      |                       |                                          |
| %clay (<0.002mm)                                           | 23                    | 6.4                                      |
| %silt (0.002-.02mm)                                        | 31                    | 11.9                                     |
| %sand (0.02-2.0mm)                                         | 46                    | 81.7                                     |
| texture                                                    | loamy                 | loamy sand                               |
| <b>OC content, mg g<sup>-1</sup></b>                       | 33±1.4                | 17.5                                     |
| <b>CEC, cmol<sub>c</sub>Kg<sup>-1</sup></b>                | 28.6                  | 1.89                                     |
| <b>Specific Surface Area, m<sup>2</sup> g<sup>-1</sup></b> | 27.7±0.1              | 20.8±1.1                                 |
| <b>Pore Specific Volume, mm<sup>3</sup> g<sup>-1</sup></b> | 35.6±0.8              | 25.4±0.5                                 |

<sup>a</sup>All analyses of CM soil and Specific Surface Area, Pore Specific Volume of Scottish soil, were carried out in our laboratory

<sup>b</sup> Data from Cooke, C.M.; Rodger, J.; Smith, A.; Fernie, K.; Shaw, G.; Somerville, R.A. Fate of prions in soil: detergent extraction of PrP from soils. *Environ. Sci. Technol.* **2007**, 41(3), 811-817).

**Table S2. Organic C and N removal in native SS and CM aggregates**

| Sample<br>s | Treatment<br>time<br>h | Residual<br>C<br>mg g <sup>-1</sup> | C removed<br>% | Residual<br>N<br>mg g <sup>-1</sup> | C/N Ratio | Specific<br>Surface Area<br>m <sup>2</sup> g <sup>-1</sup> | Pore Specific<br>Volume<br>mm <sup>3</sup> g <sup>-1</sup> |
|-------------|------------------------|-------------------------------------|----------------|-------------------------------------|-----------|------------------------------------------------------------|------------------------------------------------------------|
| <b>CM</b>   | 0                      | 33±1.4                              | -              | 2.1±0.1                             | 16±1.4    | 27.7±0.1                                                   | 35.6±0.8                                                   |
|             | 5                      | 26±1.5                              | 21             | 1.9±0.1                             | 14±1.4    | 28.7±0.3                                                   | 38.8±0.2                                                   |
|             | 24                     | 26±0.1                              | 21             | 1.7±0.1                             | 15±0.1    | -                                                          | -                                                          |
| <b>SS</b>   | 0                      | 8±0.2                               | -              | 1±0.1                               | 8±0.9     | 20.8±1.1                                                   | 25.4±0.5                                                   |
|             | 5                      | 5±0.1                               | 35             | 0.6±0.1                             | 8±1.3     | 21.3±0.8                                                   | 26.3±0.4                                                   |
|             | 24                     | 3±0.4                               | 68             | 0.4±0.1                             | 7±2.3     | -                                                          | -                                                          |

**TableS3. Soil Mineralogy**

| Mineralogy (mass percent) | CM | SS   |
|---------------------------|----|------|
| Chlorite                  | 10 | 9.4  |
| illite/IS/Mica            | 8  | 9.1  |
| feldspar                  | 22 | 16.8 |
| quartz                    | 60 | 48.7 |
| caolinite                 | -  | 8.1  |
| pyroxene                  | -  | 6.6  |
